# Supplementary material
Source: PubMed Central journal article supplement (PMC3543654)
Supplement: supp_00387.2012_tableS1.pdf [file supp_00387.2012_tableS1.pdf]

**Table S1.** Microbial taxa in ground squirrel cecal contents  
Asterisks indicate unclassified members of higher level taxa

| Kingdom  | Phylum         | Class               | Order              | Family              | Genus                   |
|----------|----------------|---------------------|--------------------|---------------------|-------------------------|
| Archaea  | Euryarchaeota  | Methanobacteria     | Methanobacteriales | Methanobacteriaceae | <i>Methanosphaera</i>   |
| Bacteria | Actinobacteria | Actinobacteria      | Coriobacteriales   | Coriobacteriaceae   | *                       |
|          |                | Actinobacteria      | Coriobacteriales   | Coriobacteriaceae   | <i>Adlercreutzia</i>    |
|          | Bacteroidetes  | Bacteroidia         | Bacteroidales      | *                   |                         |
|          |                | Bacteroidia         | Bacteroidales      | Bacteroidaceae      | <i>Bacteroides</i>      |
|          |                | Bacteroidia         | Bacteroidales      | Porphyromonadaceae  | <i>Odoribacter</i>      |
|          |                | Bacteroidia         | Bacteroidales      | Porphyromonadaceae  | <i>Parabacteroides</i>  |
|          |                | Bacteroidia         | Bacteroidales      | Prevotellaceae      | *                       |
|          |                | Bacteroidia         | Bacteroidales      | Prevotellaceae      | <i>Prevotella</i>       |
|          |                | Bacteroidia         | Bacteroidales      | Rikenellaceae       | *                       |
|          |                | Bacteroidia         | Bacteroidales      | Rikenellaceae       | <i>Alistipes</i>        |
|          | Cyanobacteria  | 4C0d-2              | YS2                | *                   |                         |
|          |                | Chloroplast         | Streptophyta       | *                   |                         |
|          | Elusimicrobia  | Elusimicrobia       | Elusimicrobiales   | Elusimicrobiaceae   | *                       |
|          | Firmicutes     | Bacilli             | Bacillales         | *                   |                         |
|          |                | Bacilli             | Lactobacillales    | *                   |                         |
|          |                | Bacilli             | Lactobacillales    | Lactobacillaceae    | *                       |
|          |                | Bacilli             | Lactobacillales    | Lactobacillaceae    | <i>Lactobacillus</i>    |
|          |                | Bacilli             | Lactobacillales    | Streptococcaceae    | <i>Streptococcus</i>    |
|          |                | Bacilli             | Turicibacterales   | Turicibacteraceae   | *                       |
|          |                | Clostridia          | Clostridiales      | *                   |                         |
|          |                | Clostridia          | Clostridiales      | Catabacteriaceae    | *                       |
|          |                | Clostridia          | Clostridiales      | FamilyXIII          | <i>Eubacterium</i>      |
|          |                | Clostridia          | Clostridiales      | Dehalobacteriaceae  | <i>Dehalobacterium</i>  |
|          |                | Clostridia          | Clostridiales      | Lachnospiraceae     | *                       |
|          |                | Clostridia          | Clostridiales      | Lachnospiraceae     | <i>Blautia</i>          |
|          |                | Clostridia          | Clostridiales      | Lachnospiraceae     | <i>Clostridium</i>      |
|          |                | Clostridia          | Clostridiales      | Lachnospiraceae     | <i>Coprococcus</i>      |
|          |                | Clostridia          | Clostridiales      | Lachnospiraceae     | <i>Roseburia</i>        |
|          |                | Clostridia          | Clostridiales      | Lachnospiraceae     | <i>Ruminococcus</i>     |
|          |                | Clostridia          | Clostridiales      | Peptococcaceae      | *                       |
|          |                | Clostridia          | Clostridiales      | Ruminococcaceae     | *                       |
|          |                | Clostridia          | Clostridiales      | Ruminococcaceae     | <i>Bacteroides</i>      |
|          |                | Clostridia          | Clostridiales      | Ruminococcaceae     | <i>Clostridium</i>      |
|          |                | Clostridia          | Clostridiales      | Ruminococcaceae     | <i>Eubacterium</i>      |
|          |                | Clostridia          | Clostridiales      | Ruminococcaceae     | <i>Faecalibacterium</i> |
|          |                | Clostridia          | Clostridiales      | Ruminococcaceae     | <i>Oscillospira</i>     |
|          |                | Clostridia          | Clostridiales      | Ruminococcaceae     | <i>Ruminococcus</i>     |
|          |                | Clostridia          | Clostridiales      | Veillonellaceae     | *                       |
|          |                | Erysipelotrichi     | Erysipelotrichales | Erysipelotrichaceae | *                       |
|          |                | Erysipelotrichi     | Erysipelotrichales | Erysipelotrichaceae | <i>Clostridium</i>      |
|          |                | Erysipelotrichi     | Erysipelotrichales | Erysipelotrichaceae | <i>Coprobacillus</i>    |
|          |                | Erysipelotrichi     | Erysipelotrichales | Erysipelotrichaceae | <i>Holdemania</i>       |
|          | Proteobacteria | Alphaproteobacteria | *                  |                     |                         |
|          |                | Alphaproteobacteria | Caulobacterales    | Caulobacteraceae    | <i>Brevundimonas</i>    |
|          |                | Alphaproteobacteria | Rhizobiales        | Bradyrhizobiaceae   | <i>Afipia</i>           |
|          |                | Alphaproteobacteria | Rickettsiales      | *                   |                         |
|          |                | Alphaproteobacteria | Sphingomonadales   | Sphingomonadaceae   | <i>Sphingomonas</i>     |
|          |                | Betaproteobacteria  | Burkholderiales    | *                   |                         |
|          |                | Betaproteobacteria  | Burkholderiales    | Comamonadaceae      | *                       |
|          |                | Betaproteobacteria  | Burkholderiales    | Comamonadaceae      | <i>Limnohabitans</i>    |
|          |                | Betaproteobacteria  | Burkholderiales    | Oxalobacteraceae    | *                       |
|          |                | Deltaproteobacteria | Desulfovibrionales | *                   |                         |

|                 |                       |                    |                     |                      |
|-----------------|-----------------------|--------------------|---------------------|----------------------|
|                 | Deltaproteobacteria   | Desulfovibrionales | Desulfovibrionaceae | *                    |
|                 | Deltaproteobacteria   | Desulfovibrionales | Desulfovibrionaceae | <i>Bilophila</i>     |
|                 | Deltaproteobacteria   | Desulfovibrionales | Desulfovibrionaceae | <i>Desulfovibrio</i> |
|                 | Deltaproteobacteria   | Desulfovibrionales | Desulfovibrionaceae | <i>LE30</i>          |
|                 | Epsilonproteobacteria | Campylobacterales  | Campylobacteraceae  | <i>Campylobacter</i> |
|                 | Gammaproteobacteria   | Aeromonadales      | Aeromonadaceae      | <i>Aeromonas</i>     |
|                 | Gammaproteobacteria   | Pseudomonadales    | Moraxellaceae       | <i>Acinetobacter</i> |
| Tenericutes     | Mollicutes            | *                  |                     |                      |
|                 | Mollicutes            | Anaeroplasmatales  | Anaeroplasmataceae  | <i>Anaeroplasma</i>  |
|                 | Mollicutes            | Mycoplasmatales    | Mycoplasmataceae    | *                    |
|                 | Mollicutes            | Mycoplasmatales    | Mycoplasmataceae    | <i>Mycoplasma</i>    |
|                 | Mollicutes            | RF39               | *                   |                      |
| Verrucomicrobia | Verrucomicrobiae      | Verrucomicrobiales | Verrucomicrobiaceae | <i>Akkermansia</i>   |
